# Supplementary material for: An oxytocin/vasopressin-related neuropeptide modulates social foraging behavior in the clonal raider ant
Source: PLoS Biol. 2021 Jun 30;19(6):e3001305. doi: 10.1371/journal.pbio.3001305 (PMC8244912; doi:10.1371/journal.pbio.3001305)
Supplement: S1 Data — (XLSX) [file pbio.3001305.s012.xlsx]

## Sheet: Figure 1C
Data for Figure 1C
	Maximum minus minimum fluorescence
Molar_Inotocin	Replicate 1	Replicate 2	Replicate 3	Replicate 4	Replicate 5	Replicate 6
3e-06	96.514	88.581	90.691	92.846	85.243	87.929
1e-06	95.808	100.523	91.188	82.626	89.039	91.915
3.33333e-07	104.345	101.625	102.1	96.997	97.68	90.592
1.11111e-07	103.921	100.769	97.807	99.129	93.985	97.831
3.7037e-08	95.67	99.715	96.316	101.046	89.751	92.37
1.23457e-08	99.358	93.278	102.171	92.055	100.542	92.47
4.11523e-09	100.081	90.454	90.242	103.731	84.198	94.2
1.37174e-09	81.758	75.36	72.467	81.875	76.041	82.258
4.57247e-10	82.583	80.398	78.3	84.001	77.079	84.095
1.52416e-10	65.104	70.006	65.655	67.094	65.027	65.25
5.08053e-11	65.855	64.754	70.111	65.639	63.635	65.751
1.69351e-11	63.419	57.334	60.869	56.693	63.4	57.504
5.64503e-12	54.827	55.034	52.903	58.91	50.192	53.621
1.88168e-12	39.657	50.454	39.748	40.175	43.361	45.787
6.27225e-13	43.244	44.183	44.325	42.206	39.597	41.35
2.09075e-13	29.775	39.985	31.97	35.514	36.57	36.538
6.96917e-14	33.861	33.702	36.574	41.326	32.47	32.007
2.32e-14	19.313	22.543	20.136	22.126	23.512	21.677
1e-15	9.11	11.05	10.703	10.433	12.226	13.286

## Sheet: transform
X=Log(X)
Molar_Inotocin	Replicate 1	Replicate 2	Replicate 3	Replicate 4	Replicate 5	Replicate 6
-5.523	96.514	88.581	90.691	92.846	85.243	87.929
-6	95.808	100.523	91.188	82.626	89.039	91.915
-6.477	104.345	101.625	102.1	96.997	97.68	90.592
-6.954	103.921	100.769	97.807	99.129	93.985	97.831
-7.431	95.67	99.715	96.316	101.046	89.751	92.37
-7.908	99.358	93.278	102.171	92.055	100.542	92.47
-8.386	100.081	90.454	90.242	103.731	84.198	94.2
-8.863	81.758	75.36	72.467	81.875	76.041	82.258
-9.34	82.583	80.398	78.3	84.001	77.079	84.095
-9.817	65.104	70.006	65.655	67.094	65.027	65.25
-10.294	65.855	64.754	70.111	65.639	63.635	65.751
-10.771	63.419	57.334	60.869	56.693	63.4	57.504
-11.248	54.827	55.034	52.903	58.91	50.192	53.621
-11.725	39.657	50.454	39.748	40.175	43.361	45.787
-12.203	43.244	44.183	44.325	42.206	39.597	41.35
-12.68	29.775	39.985	31.97	35.514	36.57	36.538
-13.157	33.861	33.702	36.574	41.326	32.47	32.007
-13.635	19.313	22.543	20.136	22.126	23.512	21.677
-15	9.11	11.05	10.703	10.433	12.226	13.286

## Sheet: normalize of transform
Molar_Inotocin	Replicate 1	Replicate 2	Replicate 3	Replicate 4	Replicate 5	Replicate 6
-5.523	97.274	88.235	90.639	93.095	84.432	87.493
-6	96.469	101.841	91.206	81.451	88.757	92.034
-6.477	106.196	103.097	103.638	97.824	98.602	90.527
-6.954	105.713	102.121	98.747	100.253	94.392	98.774
-7.431	96.312	100.921	97.048	102.437	89.568	92.552
-7.908	100.514	93.587	103.719	92.193	101.863	92.666
-8.386	101.338	90.369	90.128	105.496	83.242	94.637
-8.863	80.462	73.173	69.877	80.595	73.949	81.032
-9.34	81.402	78.912	76.522	83.017	75.131	83.125
-9.817	61.488	67.073	62.116	63.755	61.4	61.654
-10.294	62.343	61.089	67.192	62.097	59.814	62.225
-10.771	59.568	52.635	56.663	51.905	59.546	52.829
-11.248	49.779	50.015	47.587	54.431	44.498	48.405
-11.725	32.496	44.797	32.599	33.086	36.716	39.48
-12.203	36.583	37.652	37.814	35.4	32.427	34.425
-12.68	21.237	32.87	23.738	27.776	28.979	28.942
-13.157	25.892	25.711	28.983	34.397	24.308	23.78
-13.635	9.318	12.998	10.255	12.523	14.102	12.011
-15	-2.307	-0.096	-0.492	-0.799	1.243	2.451

## Sheet: Non lin fit
Data analyzed with Prism log(agonist) vs. normalized response -- Variable slope
	Experiment 33015
log(agonist) vs. normalized response -- Variable slope
Best-fit values
LogEC50	-11.13
HillSlope	0.3027
EC50	7.427e-12
Std. Error
LogEC50	0.05558
HillSlope	0.01132
95% Confidence Intervals
LogEC50	-11.24 to -11.02
HillSlope	0.2802 to 0.3251
EC50	5.763e-012 to 9.573e-012
Goodness of Fit
Degrees of Freedom	112
R²	0.9582
Absolute Sum of Squares	4818
Sy.x	6.559
Number of points
Analyzed	114
